# Supplementary material for: Synchrony of complex signals in an acoustically communicating katydid
Source: Oxford University Press journal article supplement (doi:10.1242/jeb.241877), 2021-03-30
Supplement: jeb241877supp.pdf [file jeb241877supp.pdf]

Figure S1

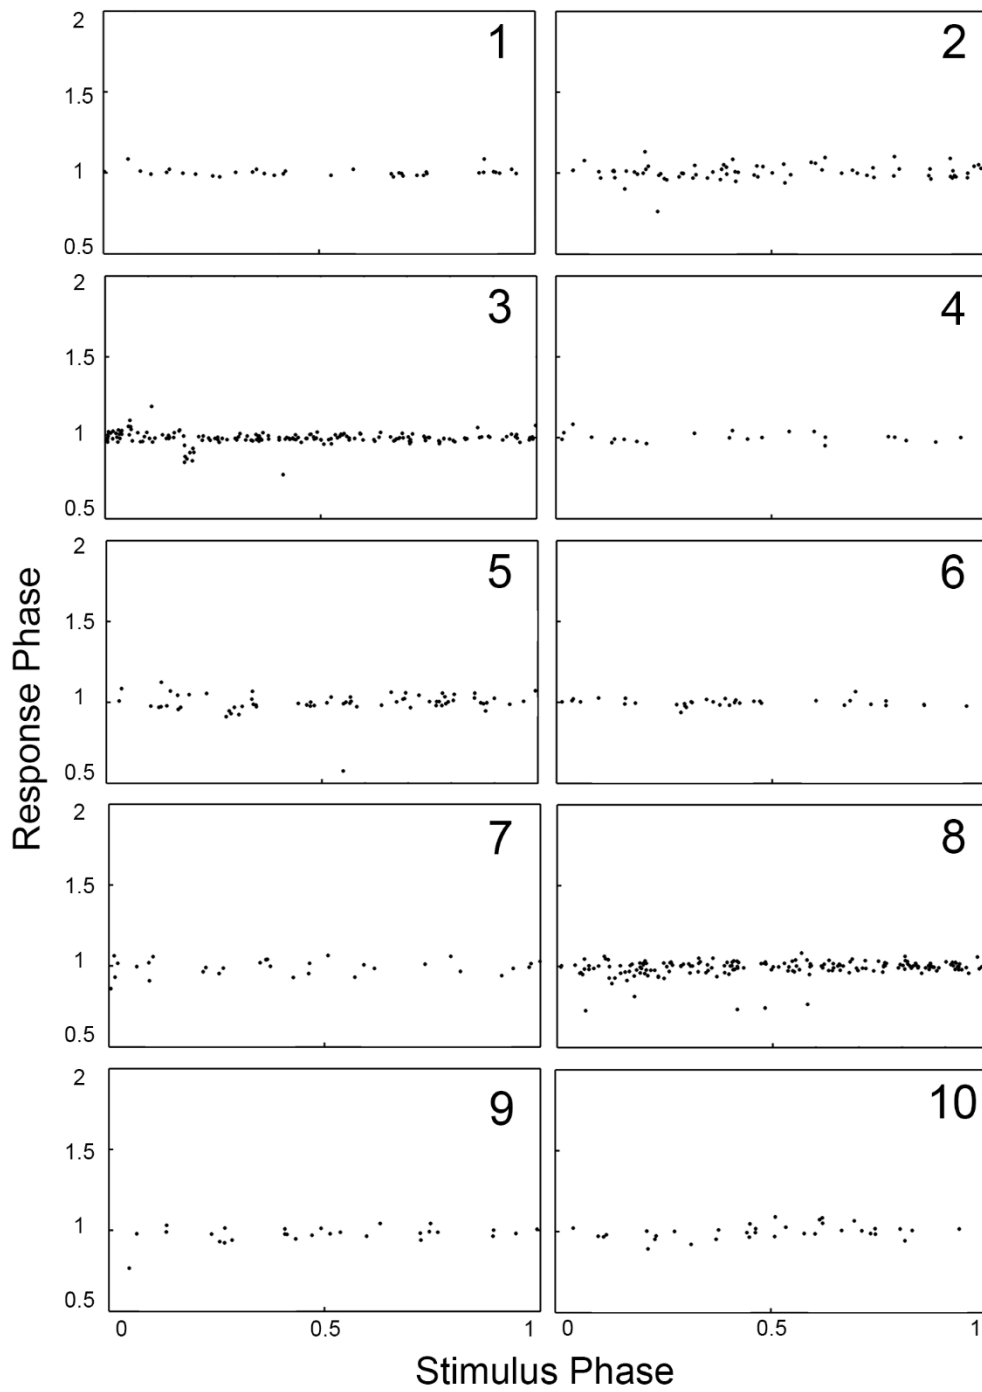

Fig. S1. Trill Phase Response Curves obtained by plotting the response phase of trills in response to playback of stimulus chirps. The last row depicts the phase response in the period following the disturbed period. Numbers refer to individual animals.
